# Supplementary material
Source: Royal Society of Chemistry journal article supplement (doi:10.1039/d6dt00593d)

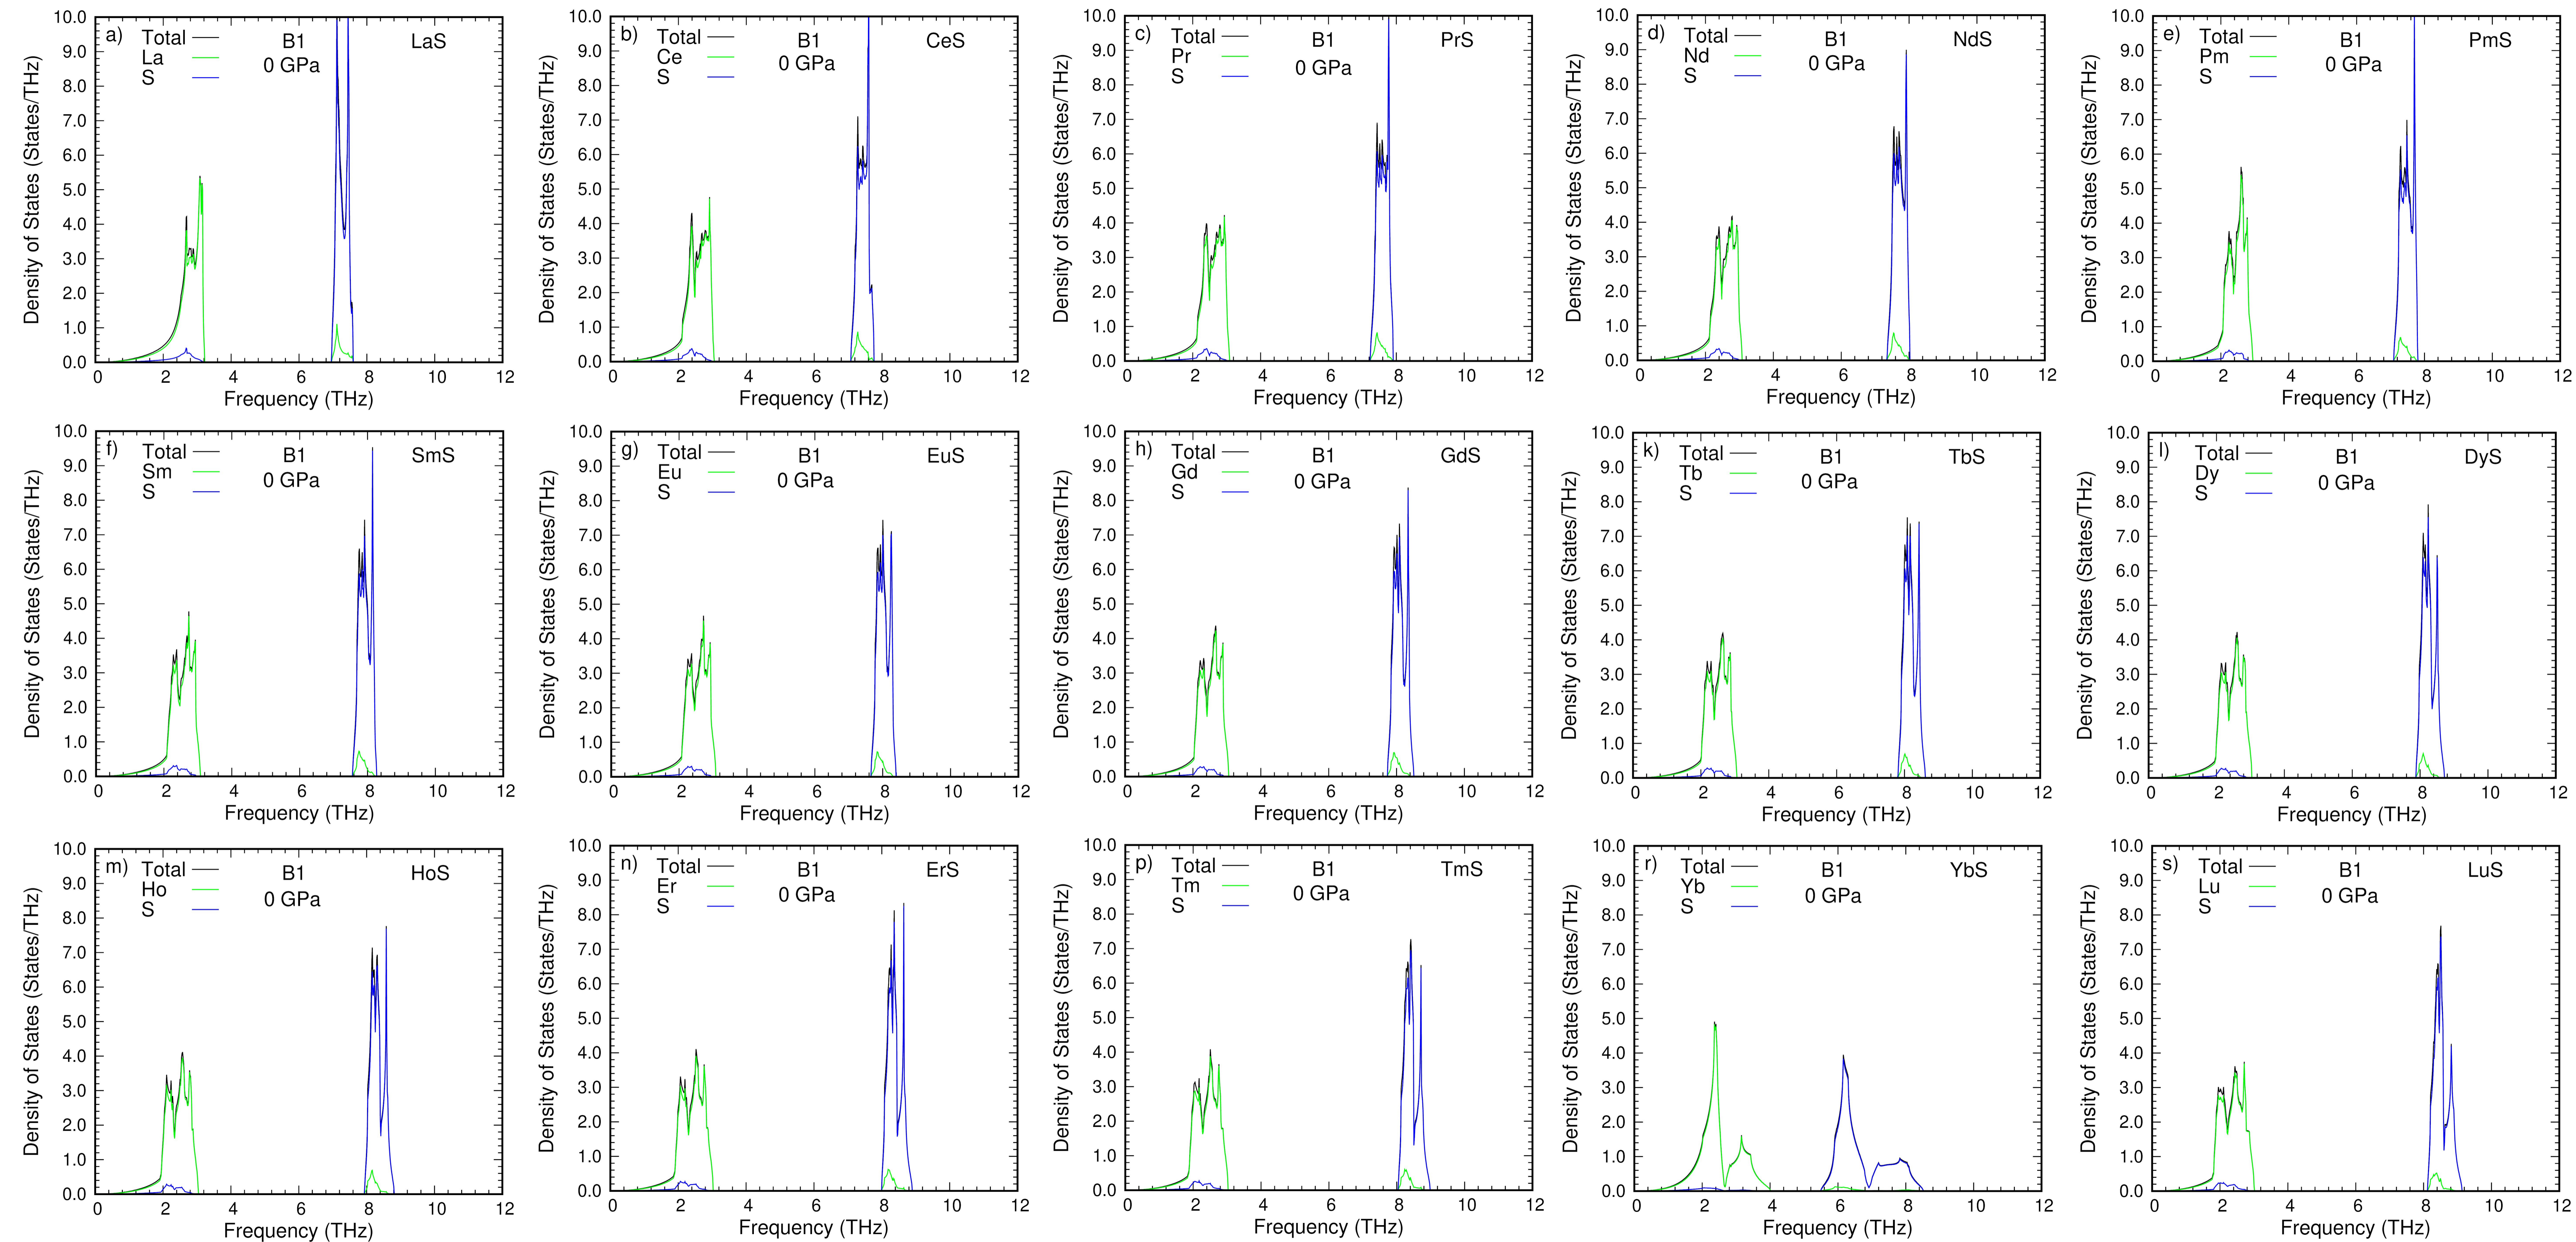

Supplement: d6dt00593d1.pdf [file d6dt00593d1.pdf]

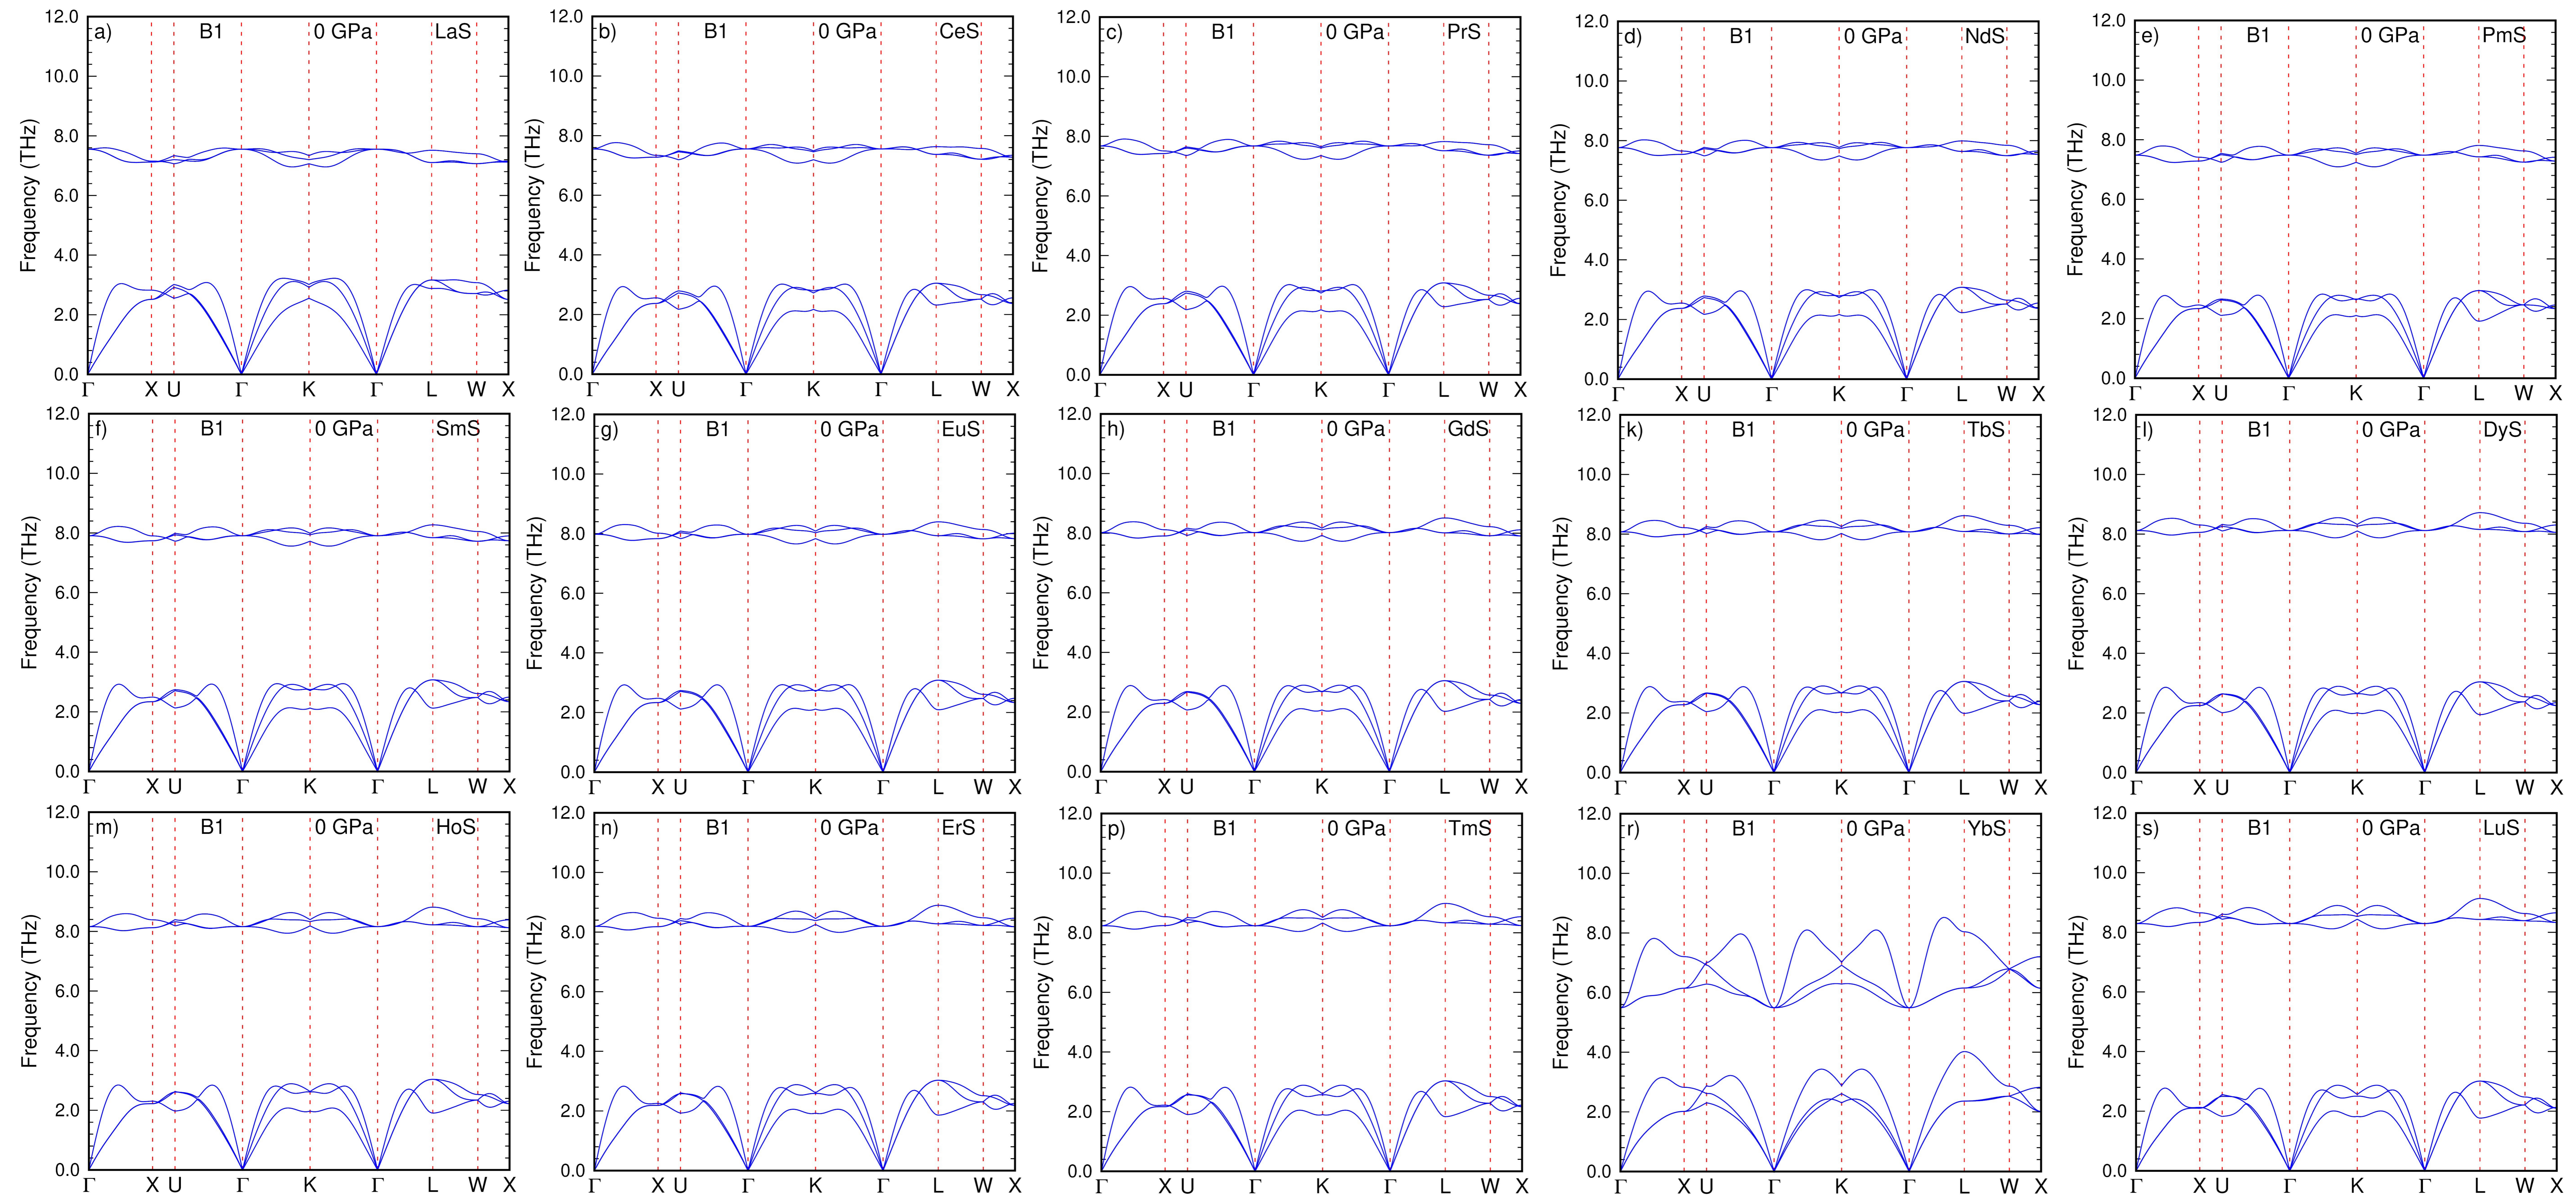

Supplement: d6dt00593d2.pdf [file d6dt00593d2.pdf]

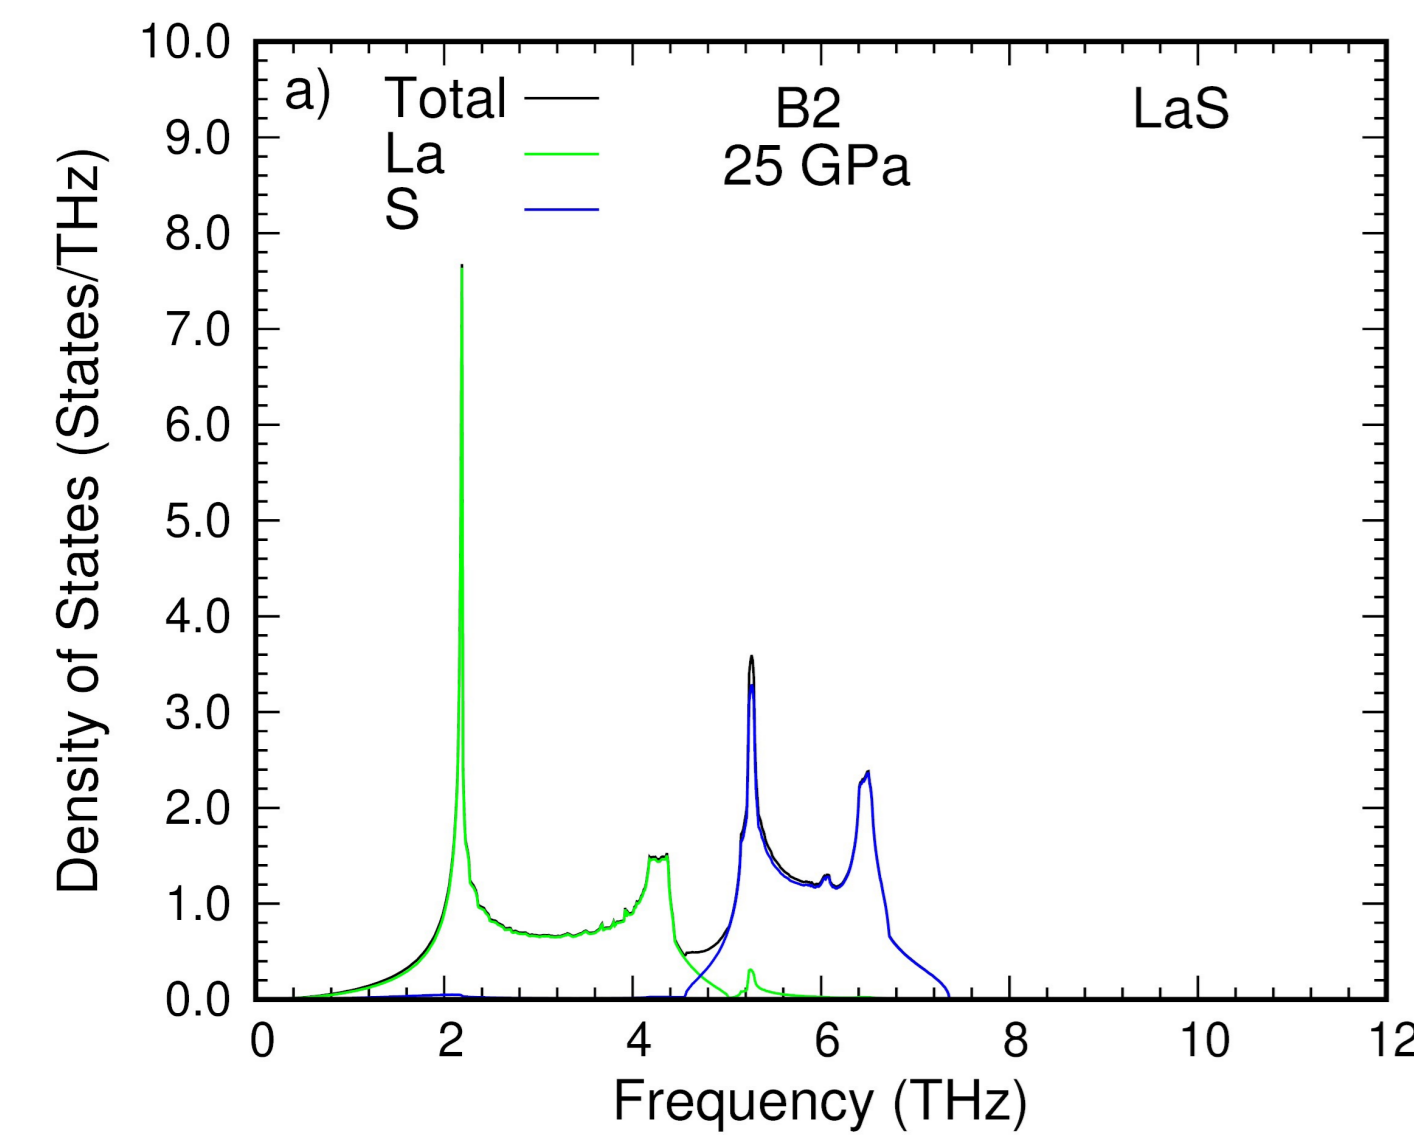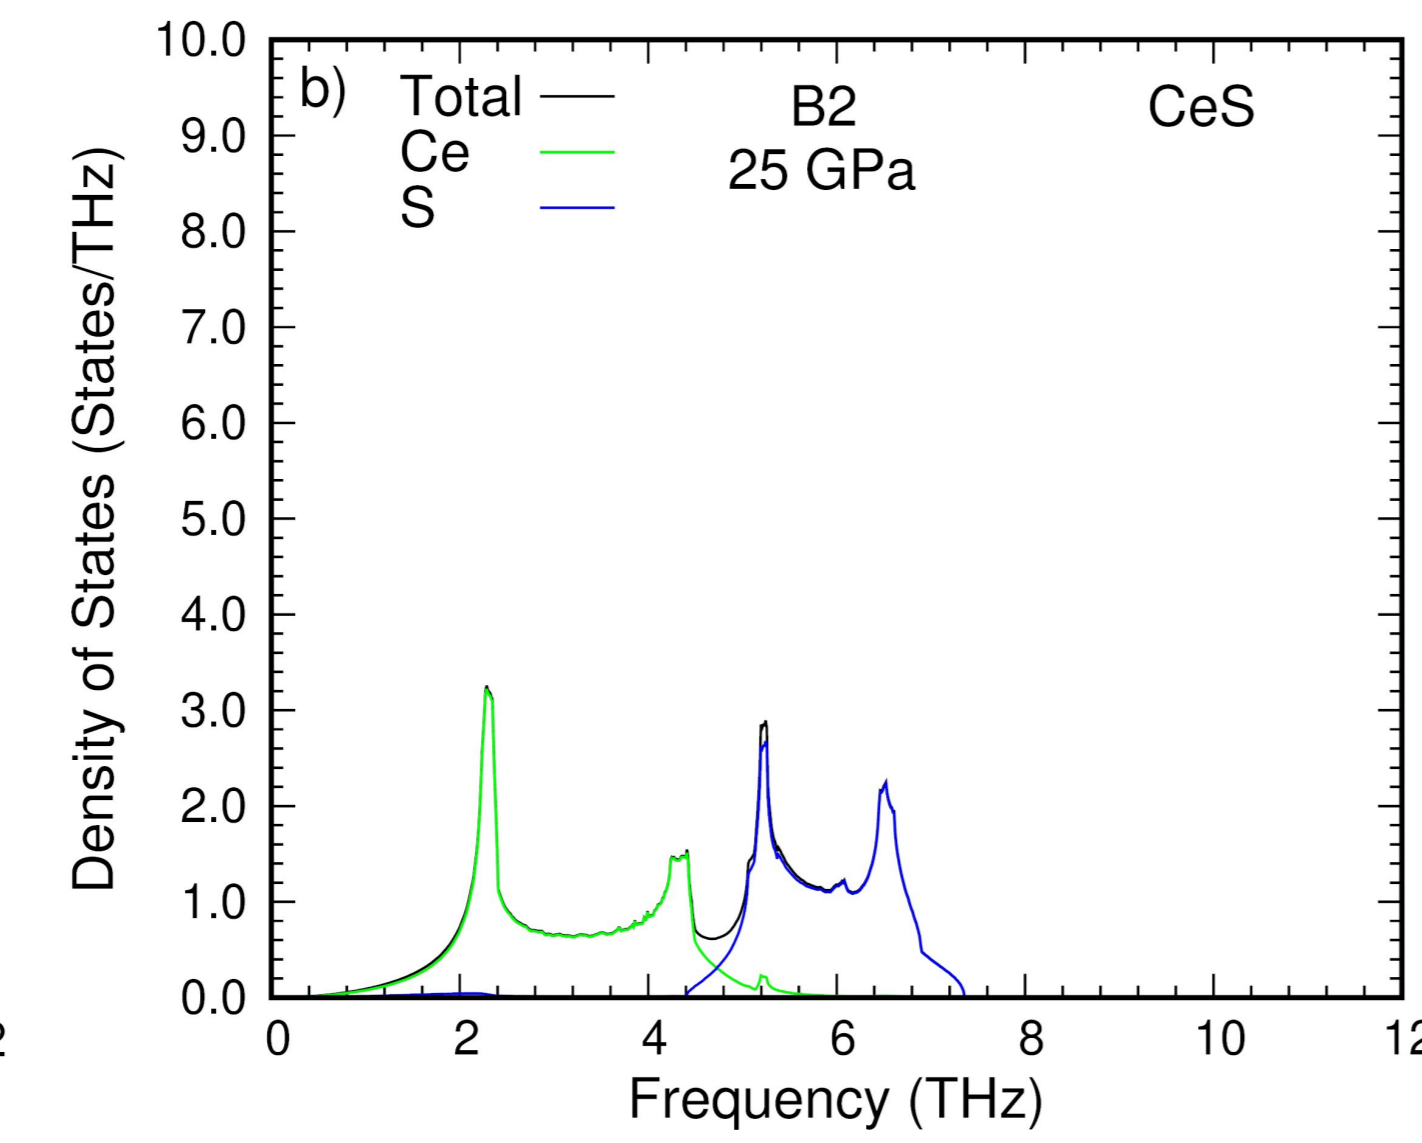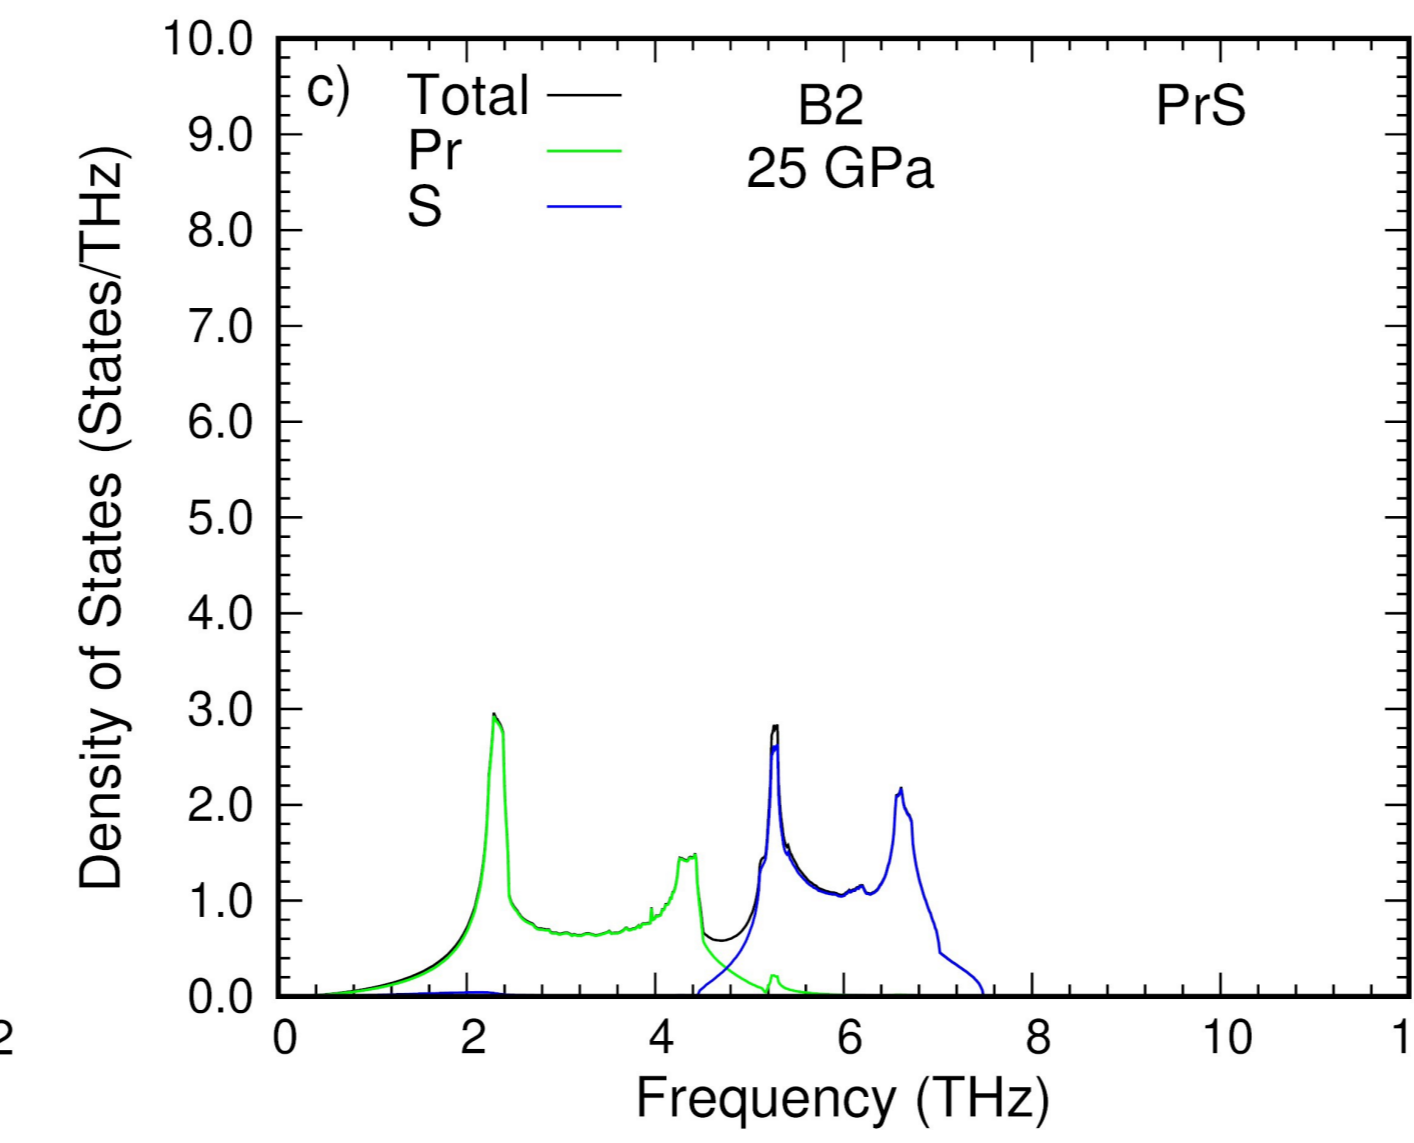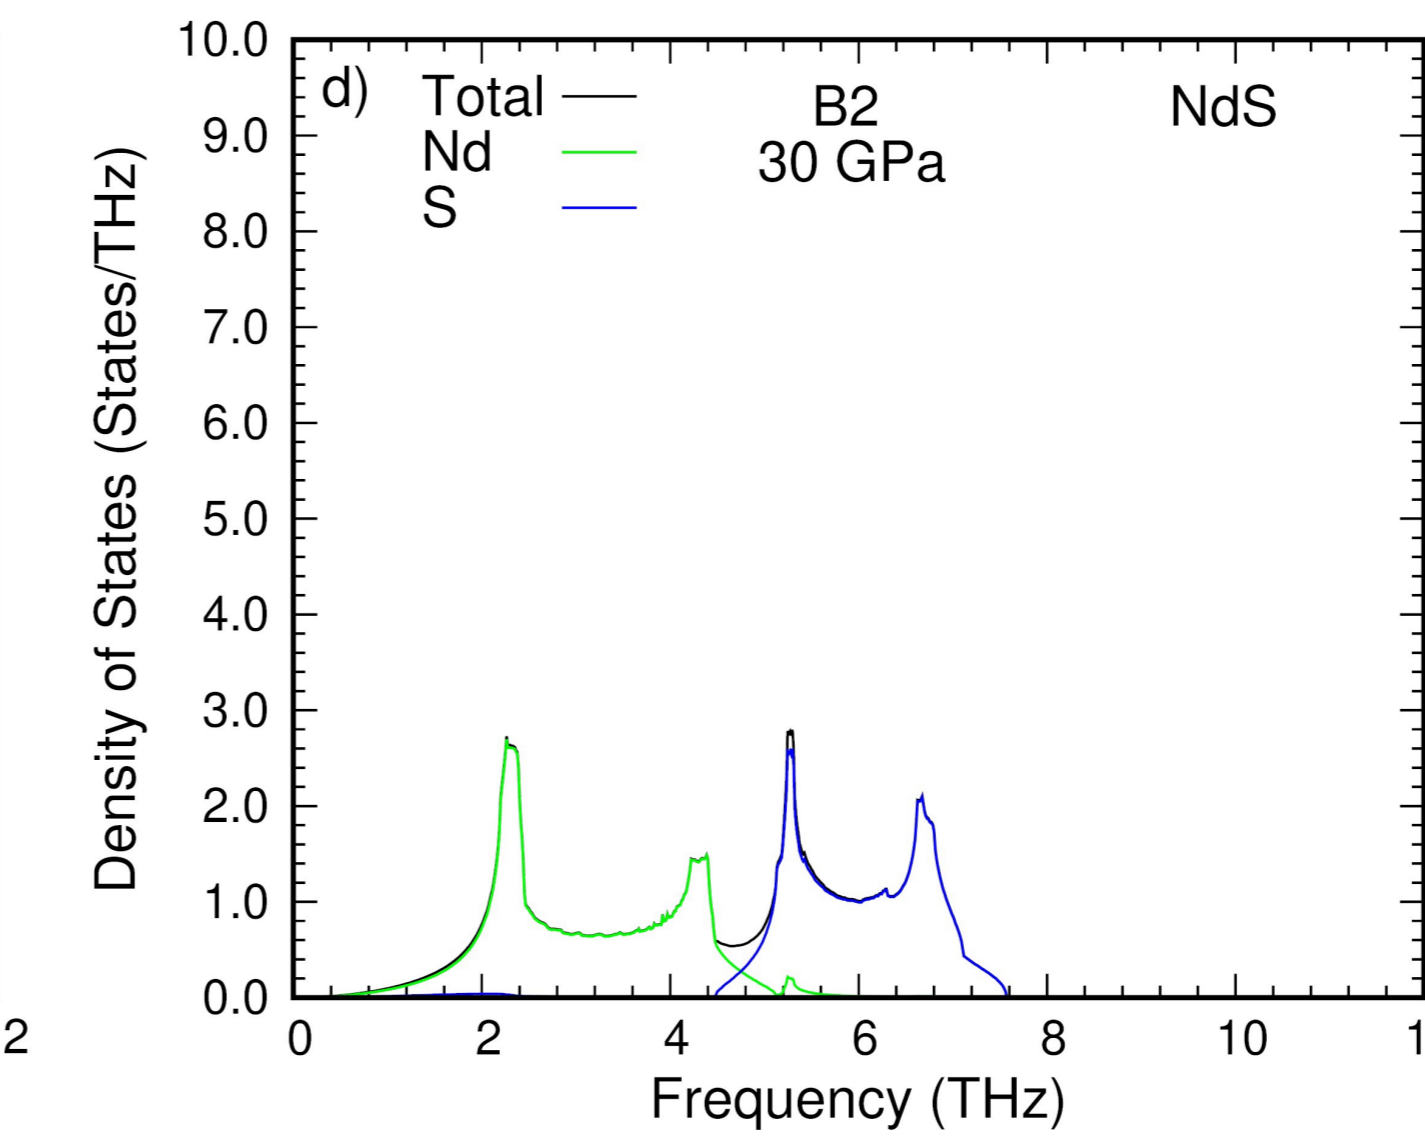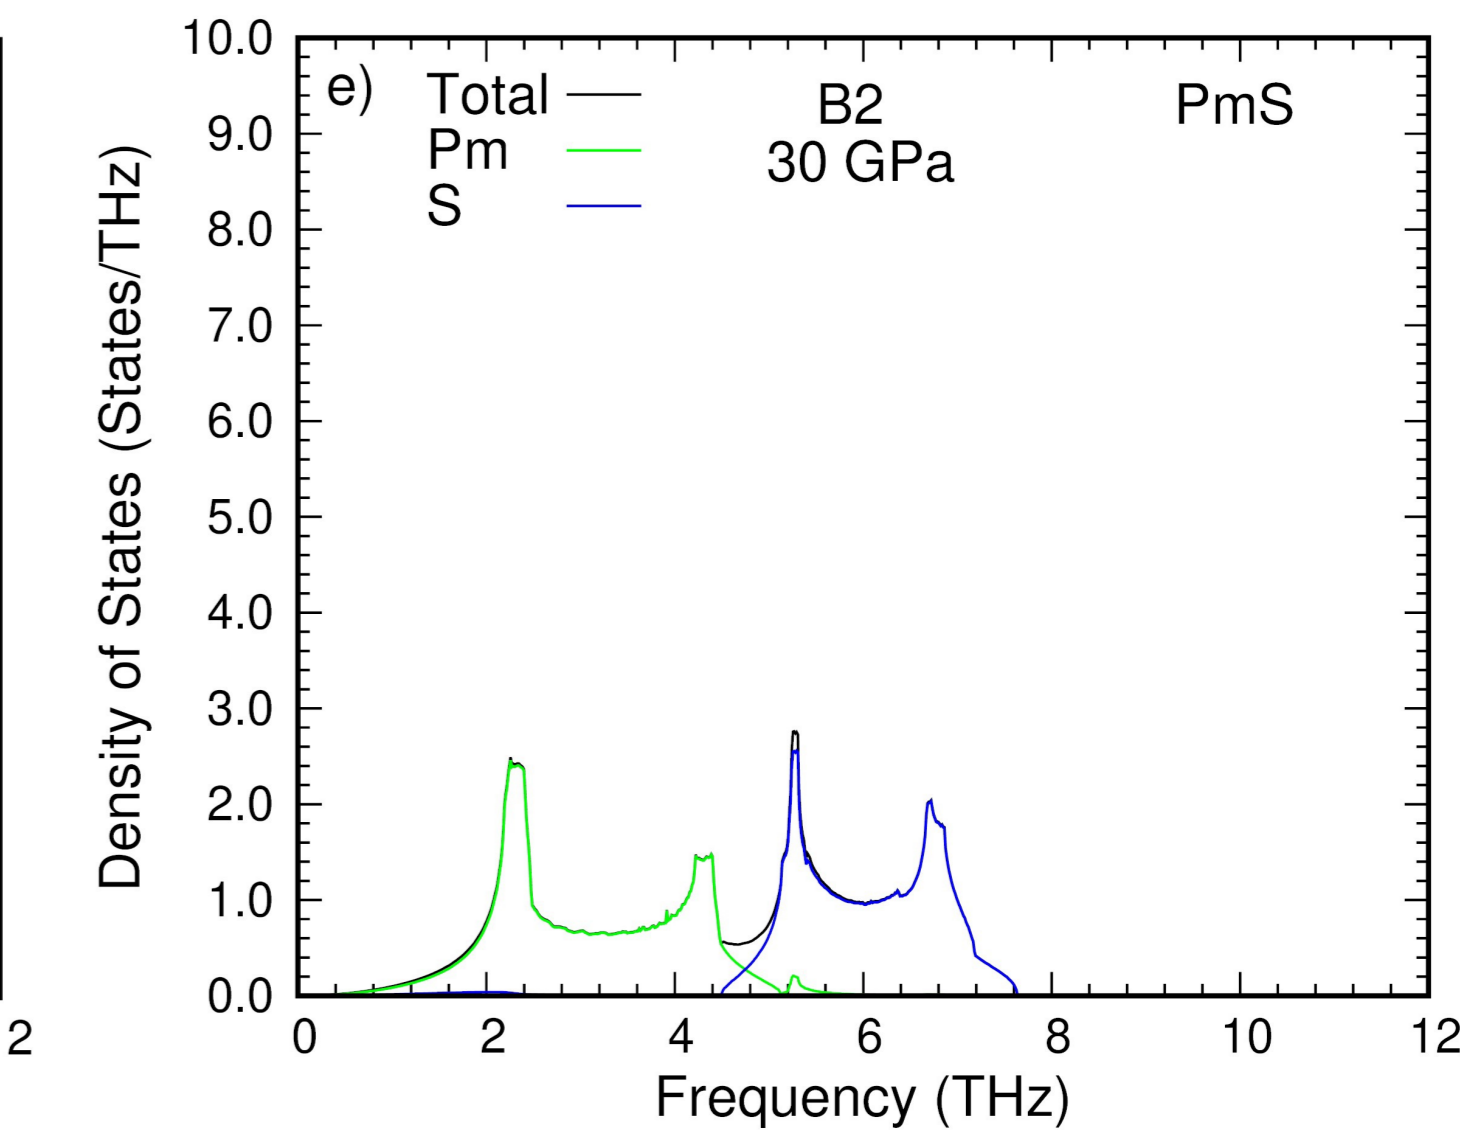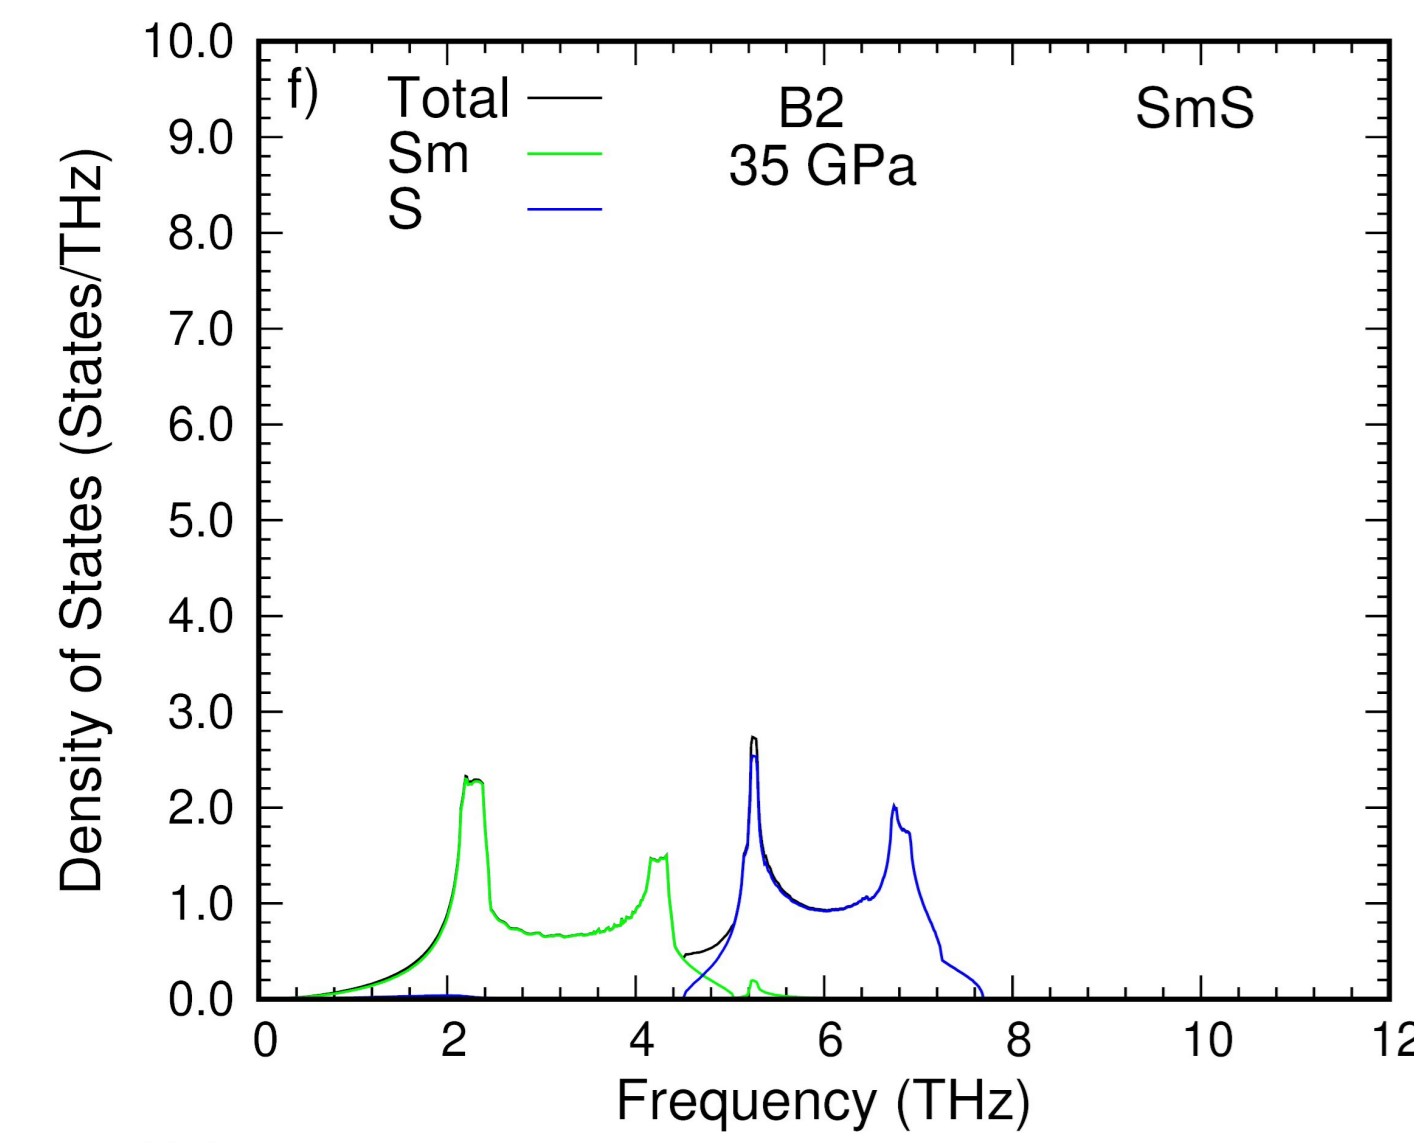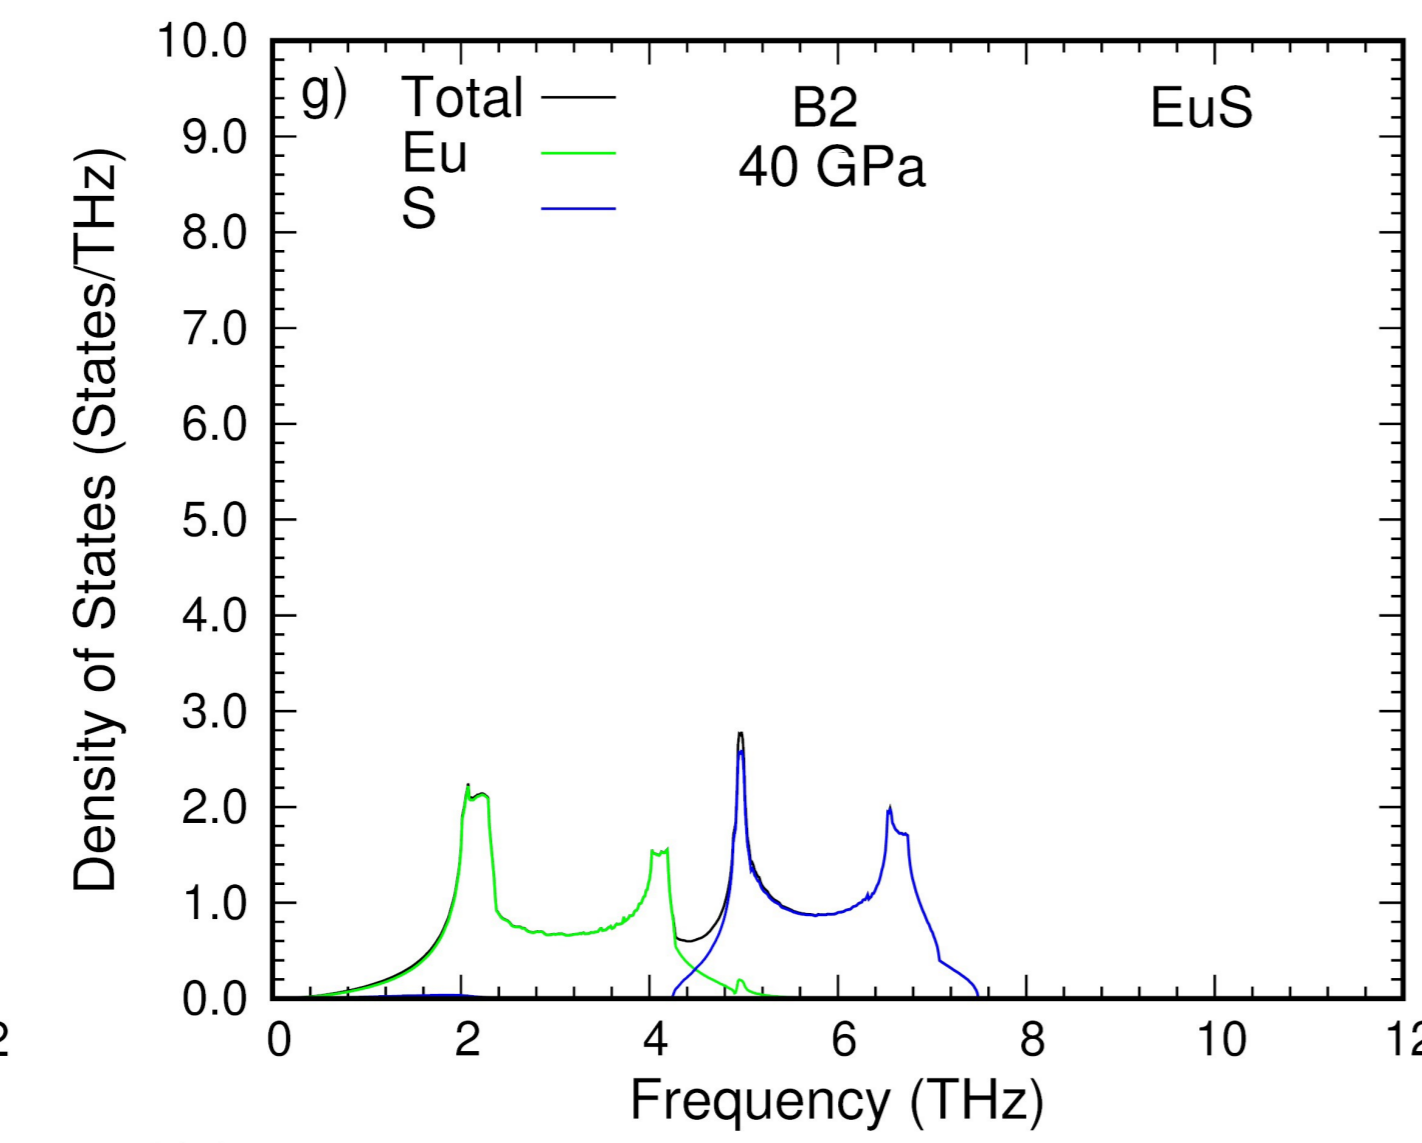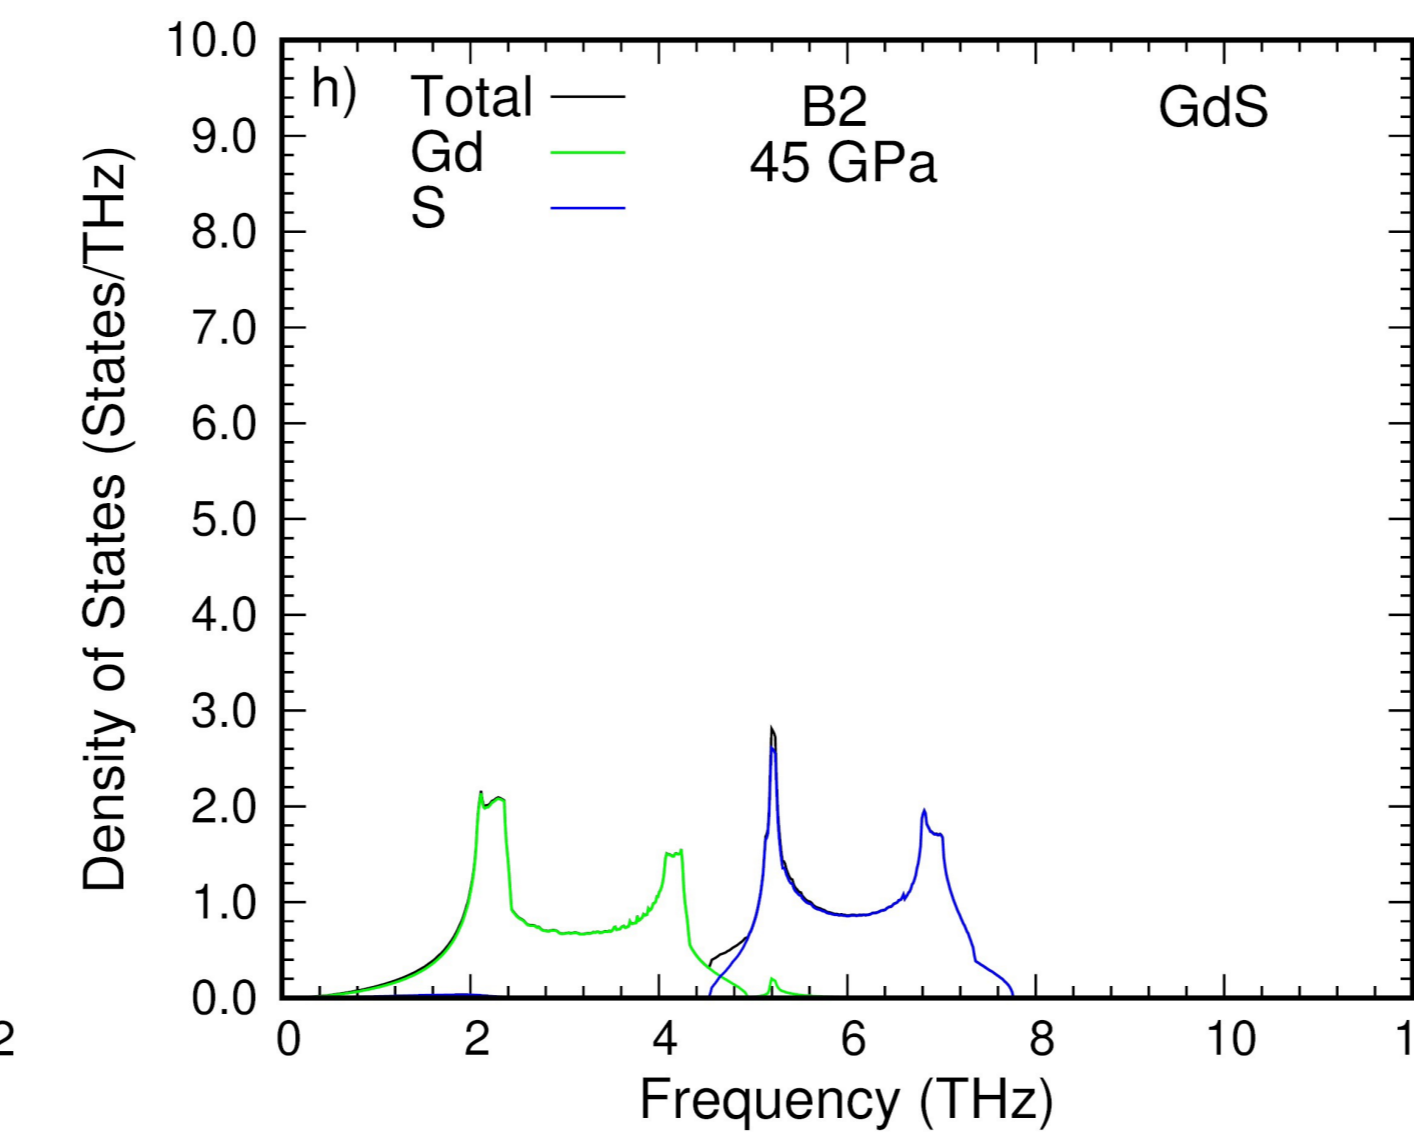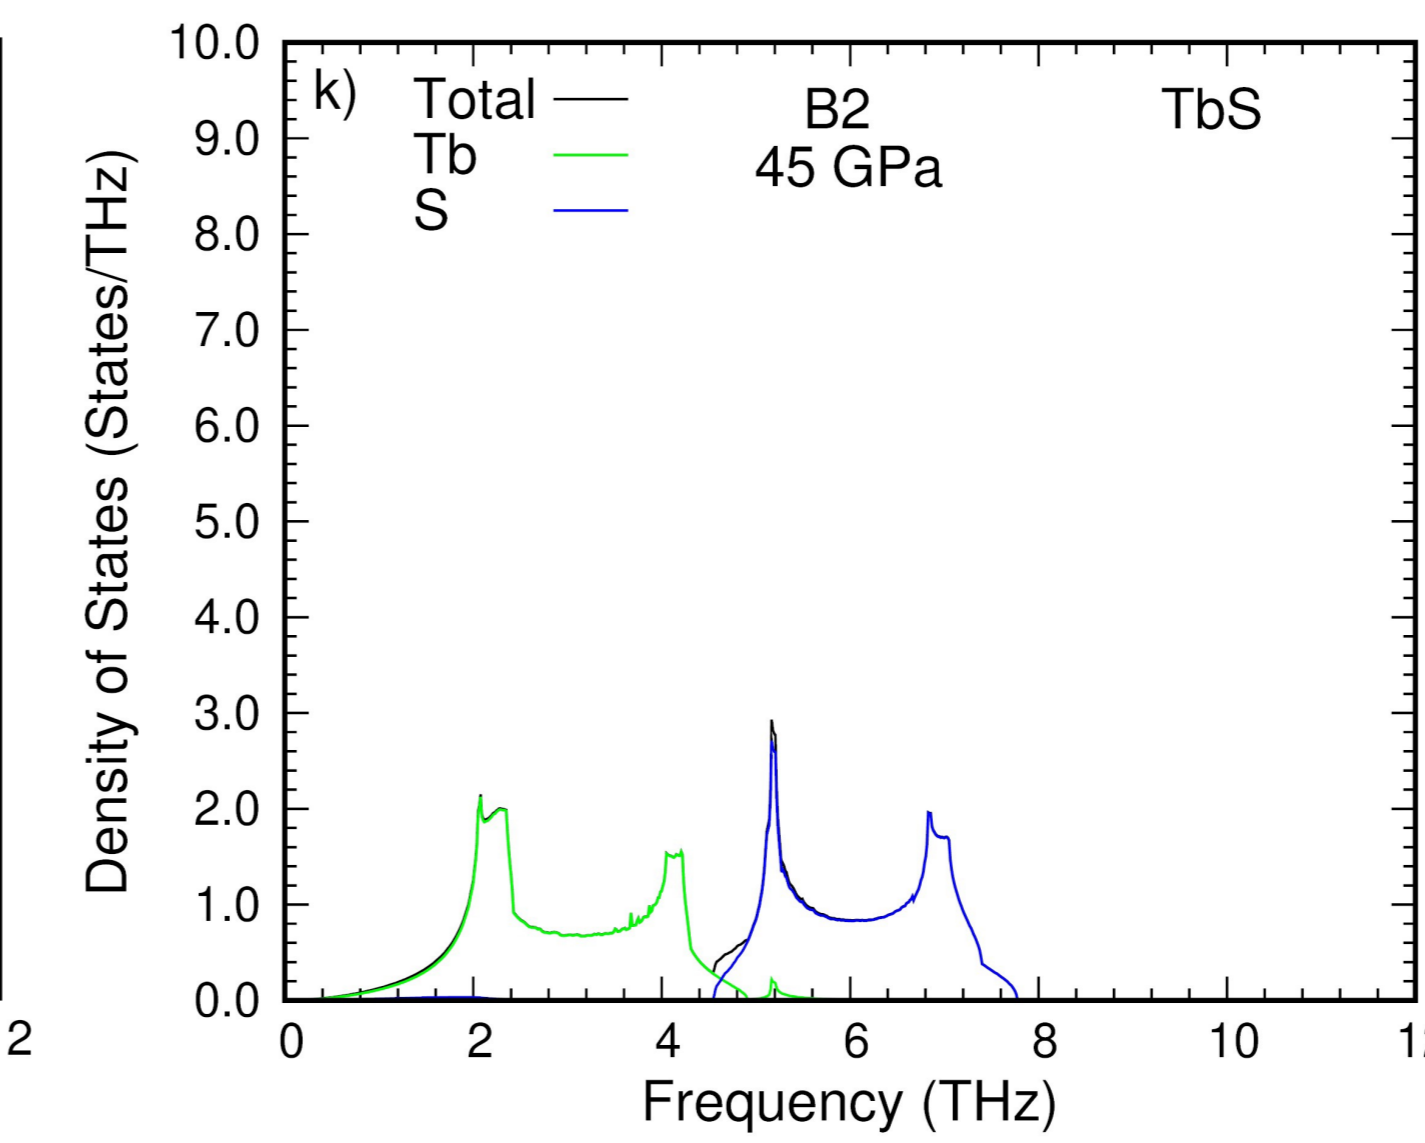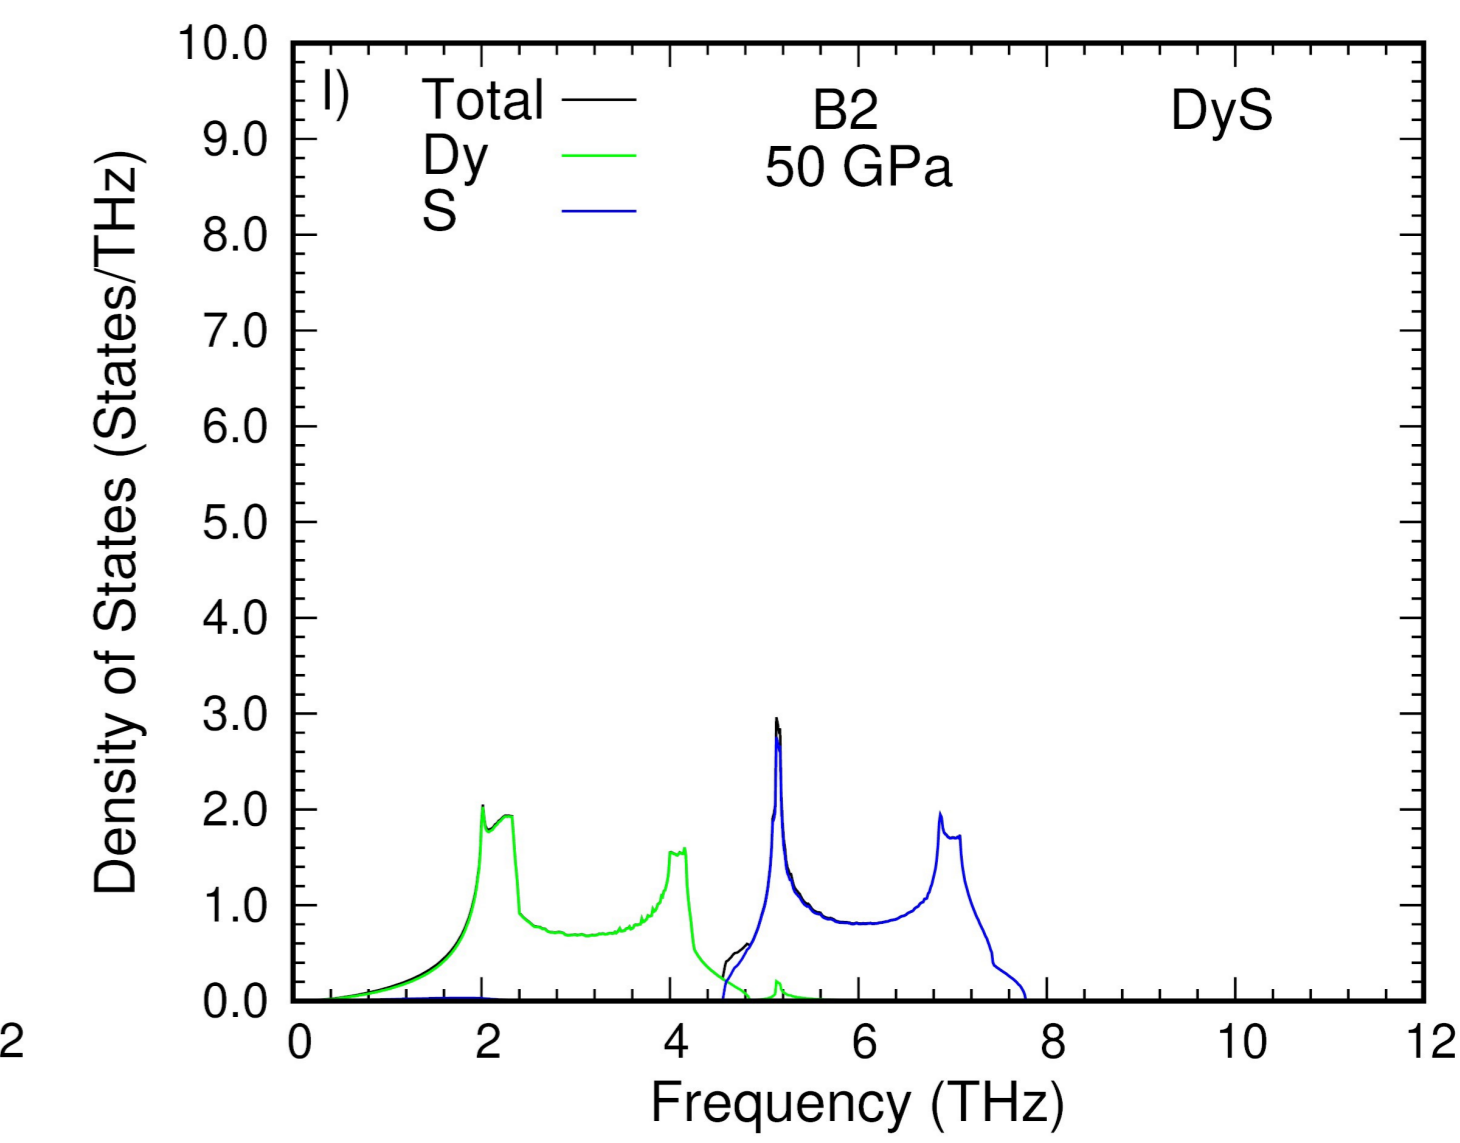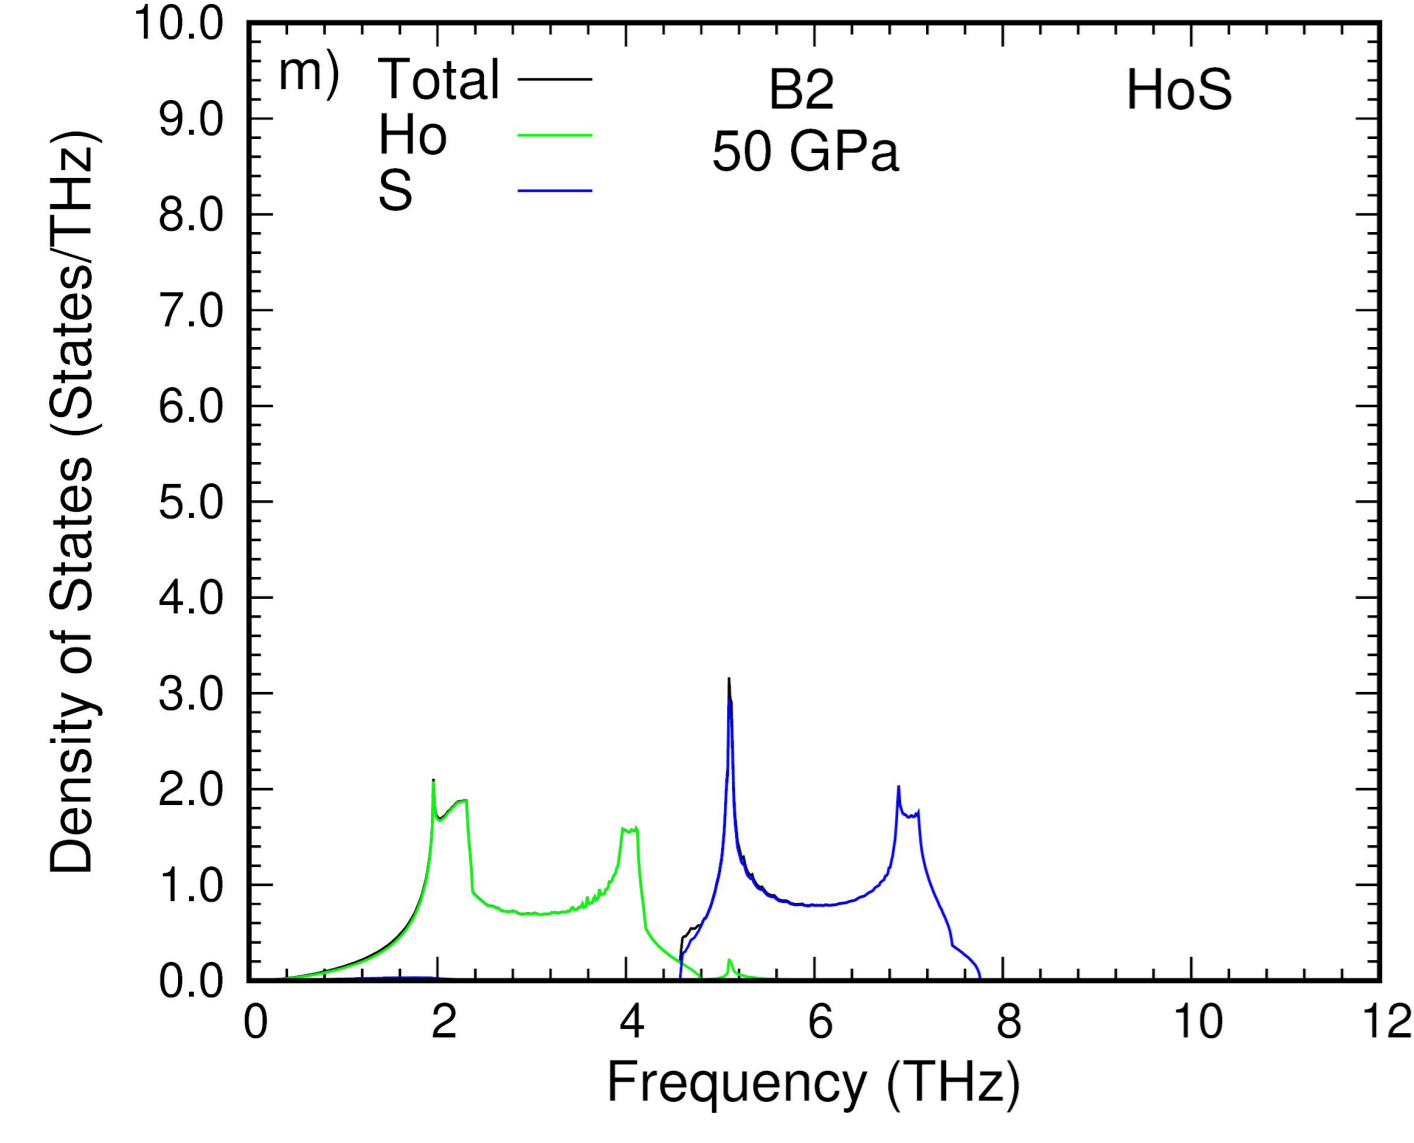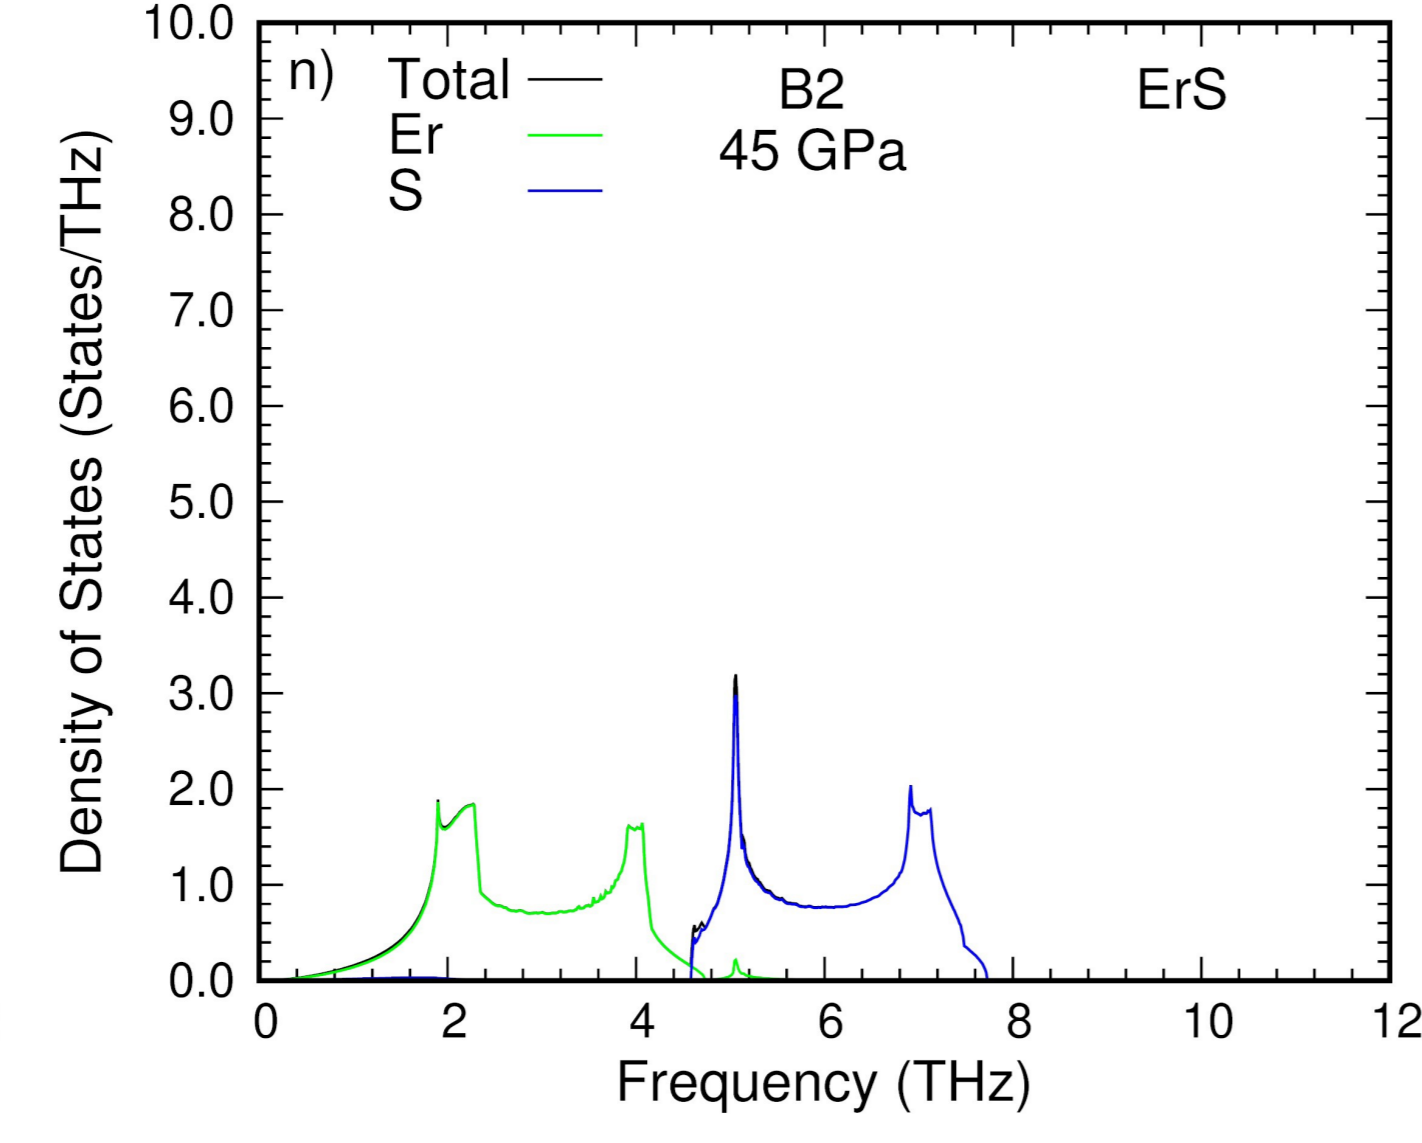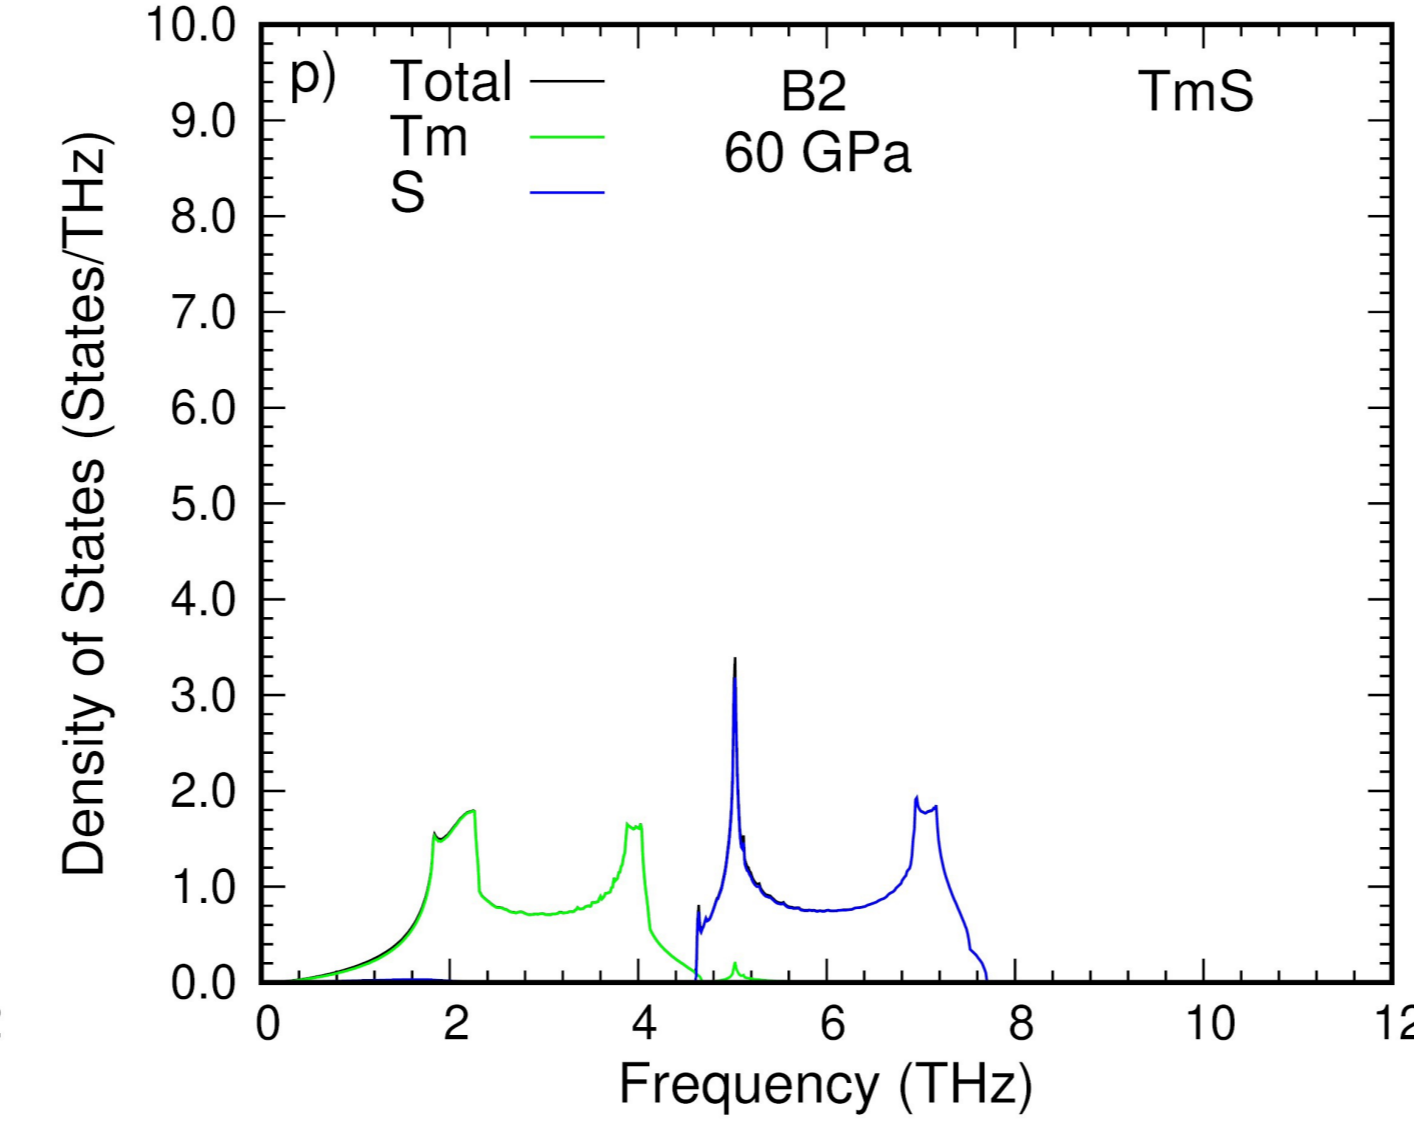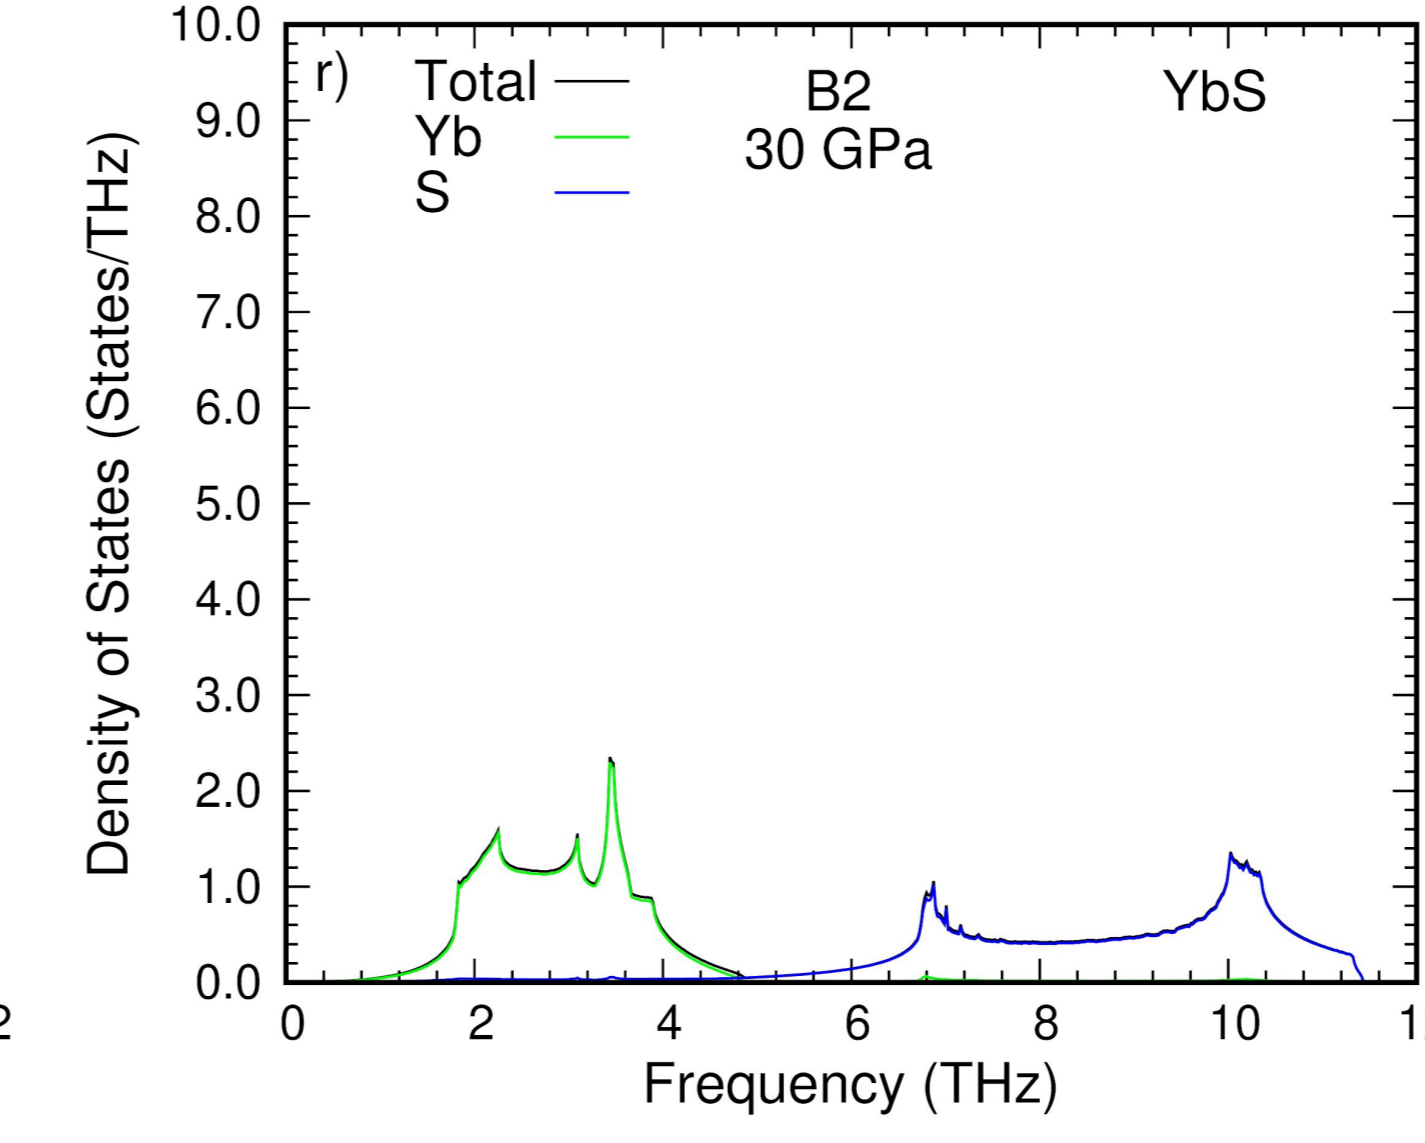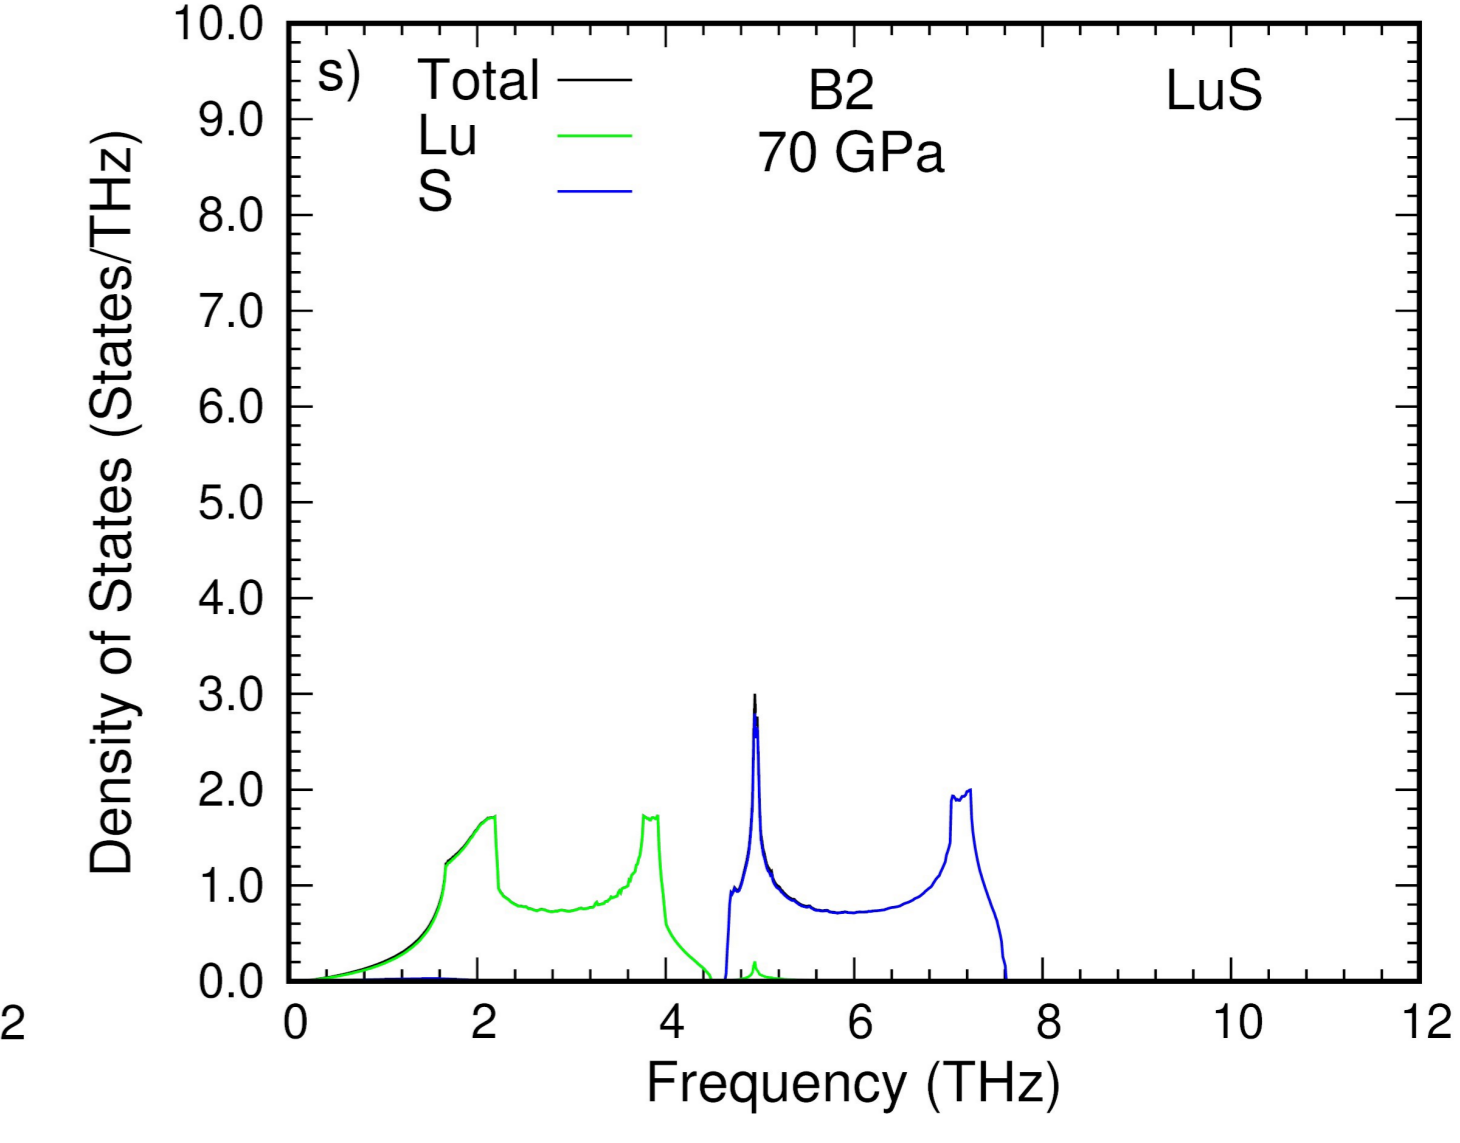

Supplement: d6dt00593d3.pdf [file d6dt00593d3.pdf]

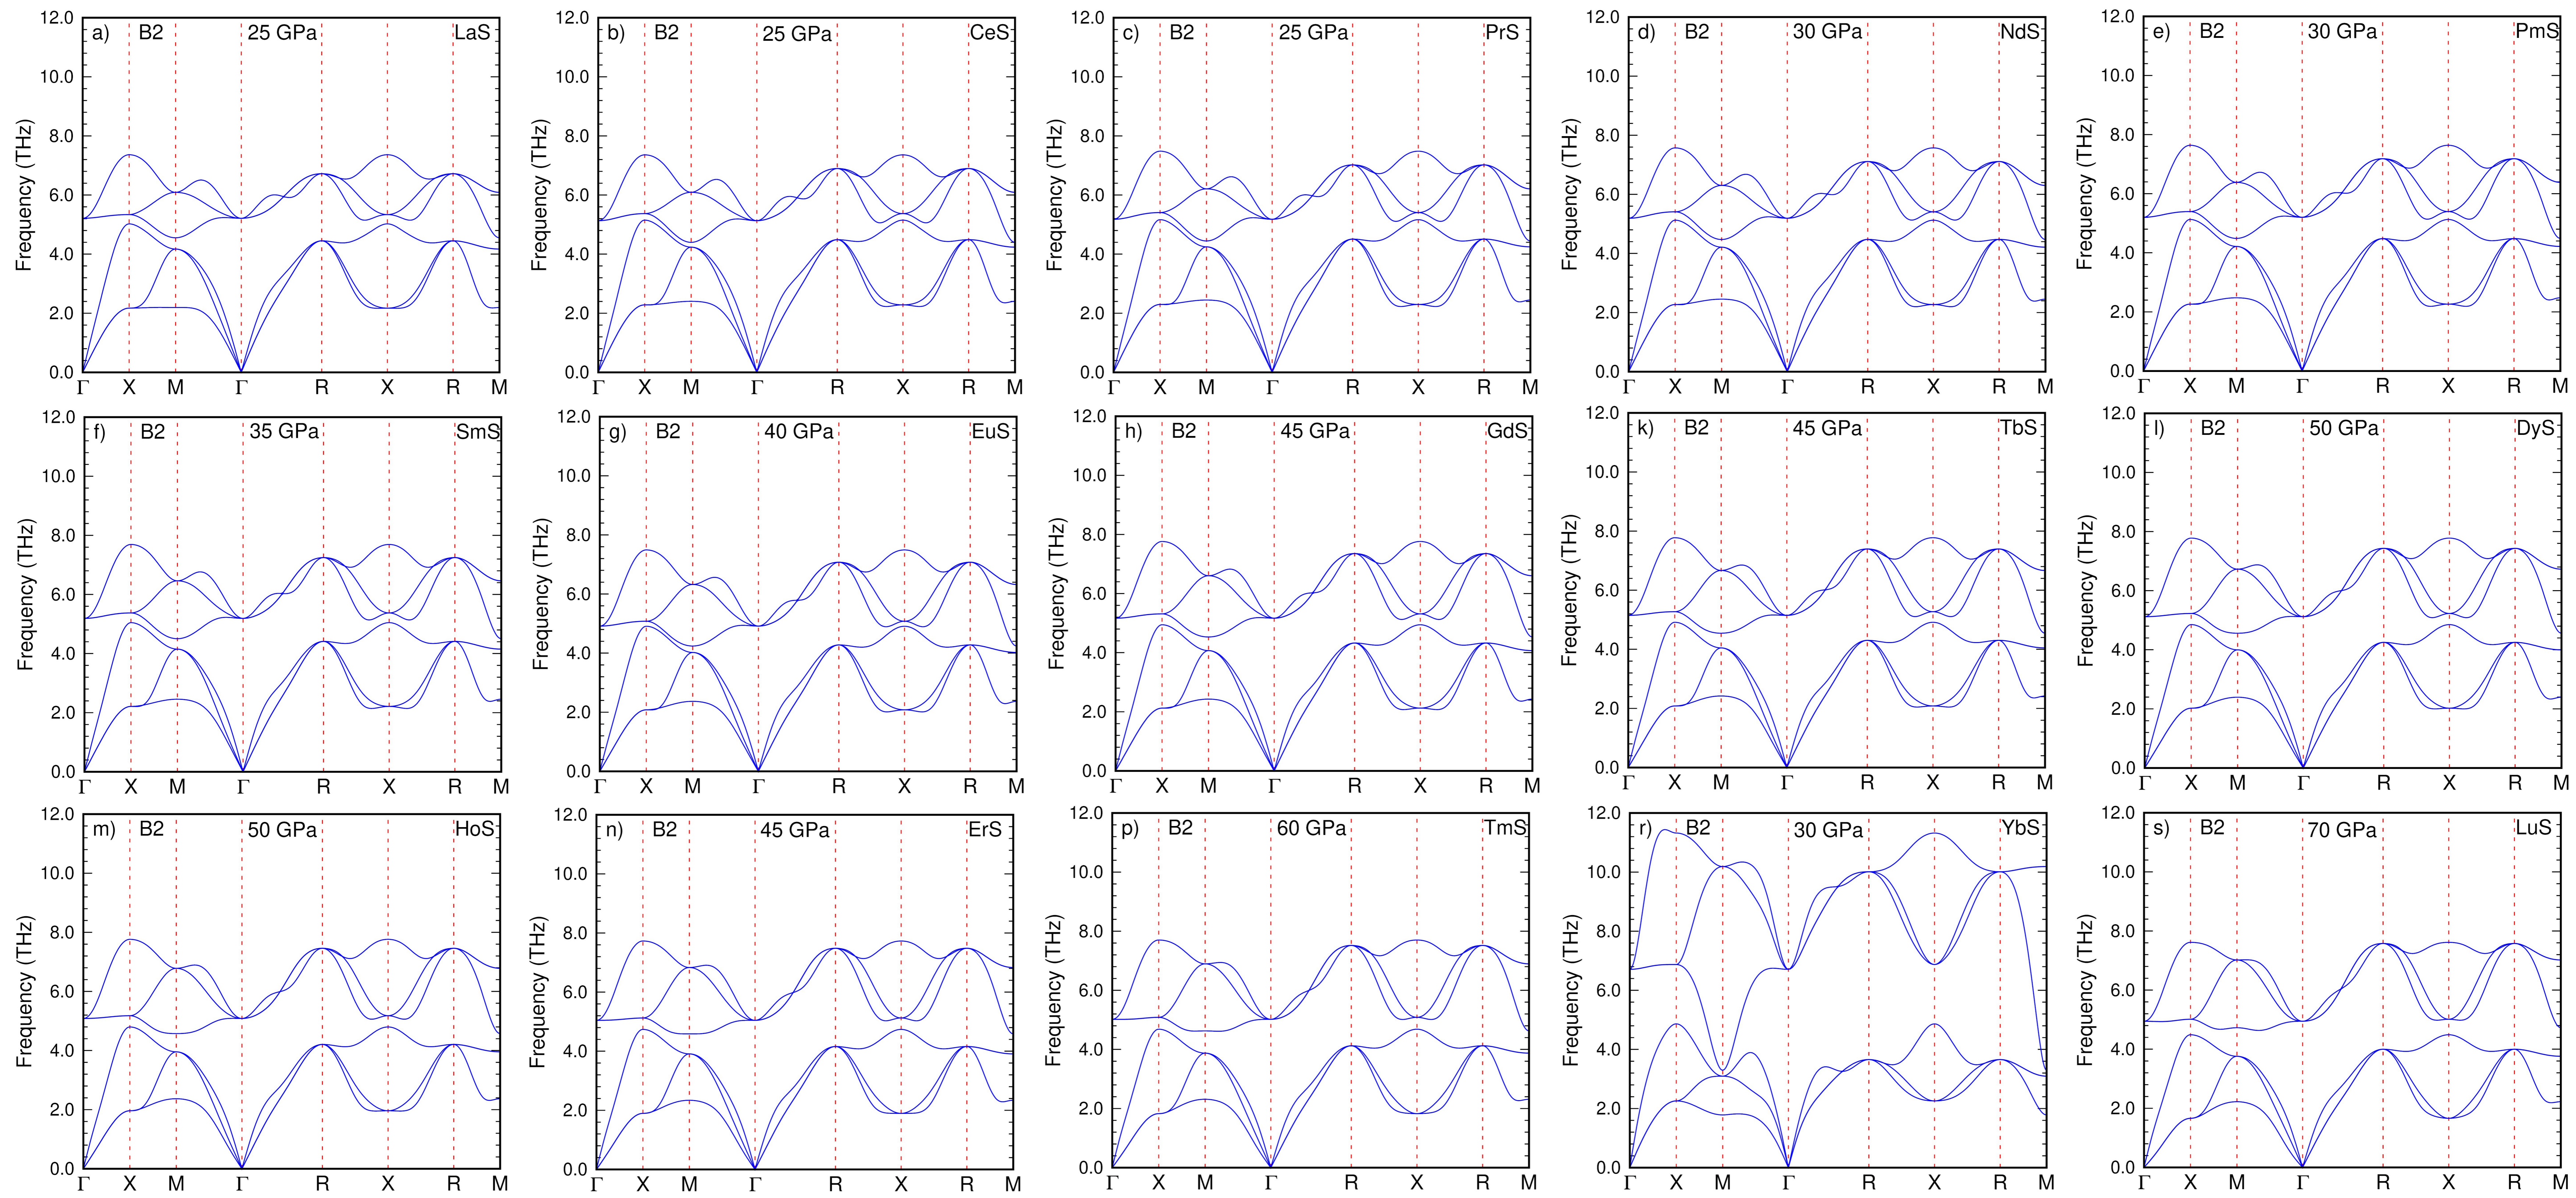

Supplement: d6dt00593d4.pdf [file d6dt00593d4.pdf]
